# Supplementary material for: Applicability of a Monolithic Column for Separation of Isoquinoline Alkalodis from Chelidonium majus Extract
Source: PubMed Central journal article supplement (PMC6804227; doi:10.3390/molecules24193612), 2019-10-07
Supplement: molecules-24-03612-s001.pdf [file molecules-24-03612-s001.pdf]

# Applicability of a Monolithic Column for Separation of Isoquinoline Alkaloids from *Chelidonium majus* Extract

Michał Staniak<sup>1</sup>, Magdalena Wójciak-Kosior<sup>1,\*</sup>, Ireneusz Sowa<sup>1</sup>, Maciej Strzemiński<sup>1</sup>, Jan Sawicki<sup>1</sup>, Sławomir Dresler<sup>2</sup> and Katarzyna Tyszczyk-Rotko<sup>3</sup>

<sup>1</sup> Department of Analytical Chemistry, Medical University of Lublin, Chodźki 4a, 20-093 Lublin, Poland

<sup>2</sup> Department of Plant Physiology, Maria Curie-Skłodowska University, Akademicka 19, 20-033 Lublin, Poland

<sup>3</sup> Faculty of Chemistry, Maria Curie-Skłodowska University, Maria Curie-Skłodowska Square 3, 20-031 Lublin, Poland

\* Correspondence: kosiorma@wp.pl

(a)

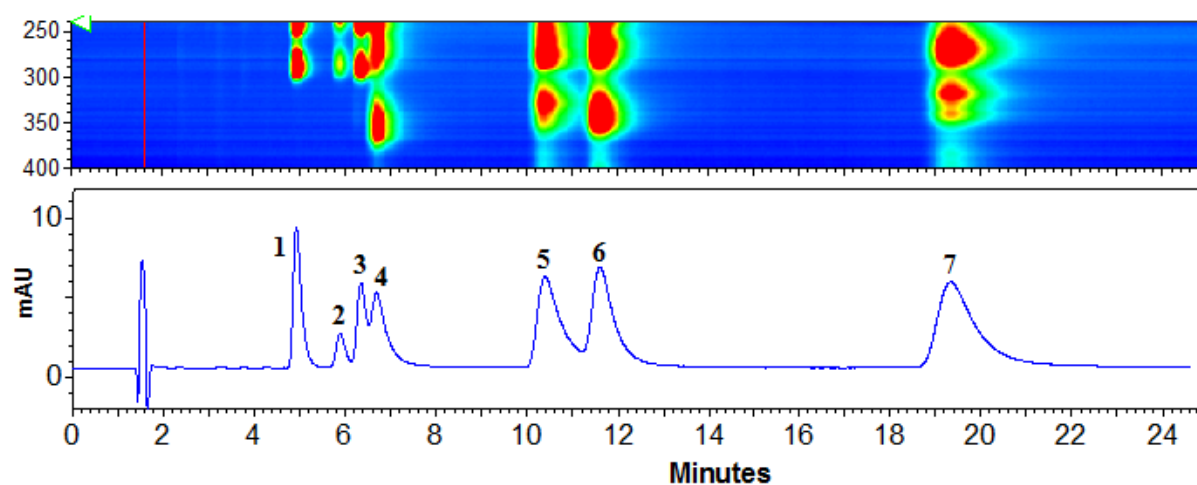

(b)

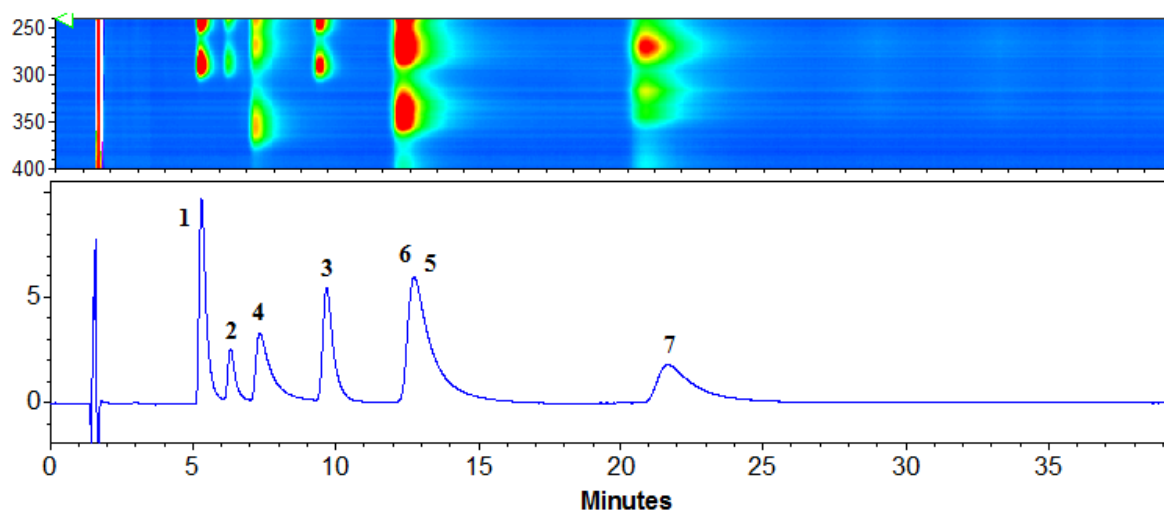

**Figure 1S.** Example of chromatogram obtained using monolithic column as a stationary phase and mobile phase composed of acetonitrile and 15mM aqueous solution of ammonium acetate (2:8, v/v) adjusted with acetic acid to pH 4 (a) and to pH 5 (b): 1- protopine, 2- allocryptopine, 3- chelidonine, 4- coptisine, 5- sanguinarine, 6- berberine, and 7- chelerythrine.

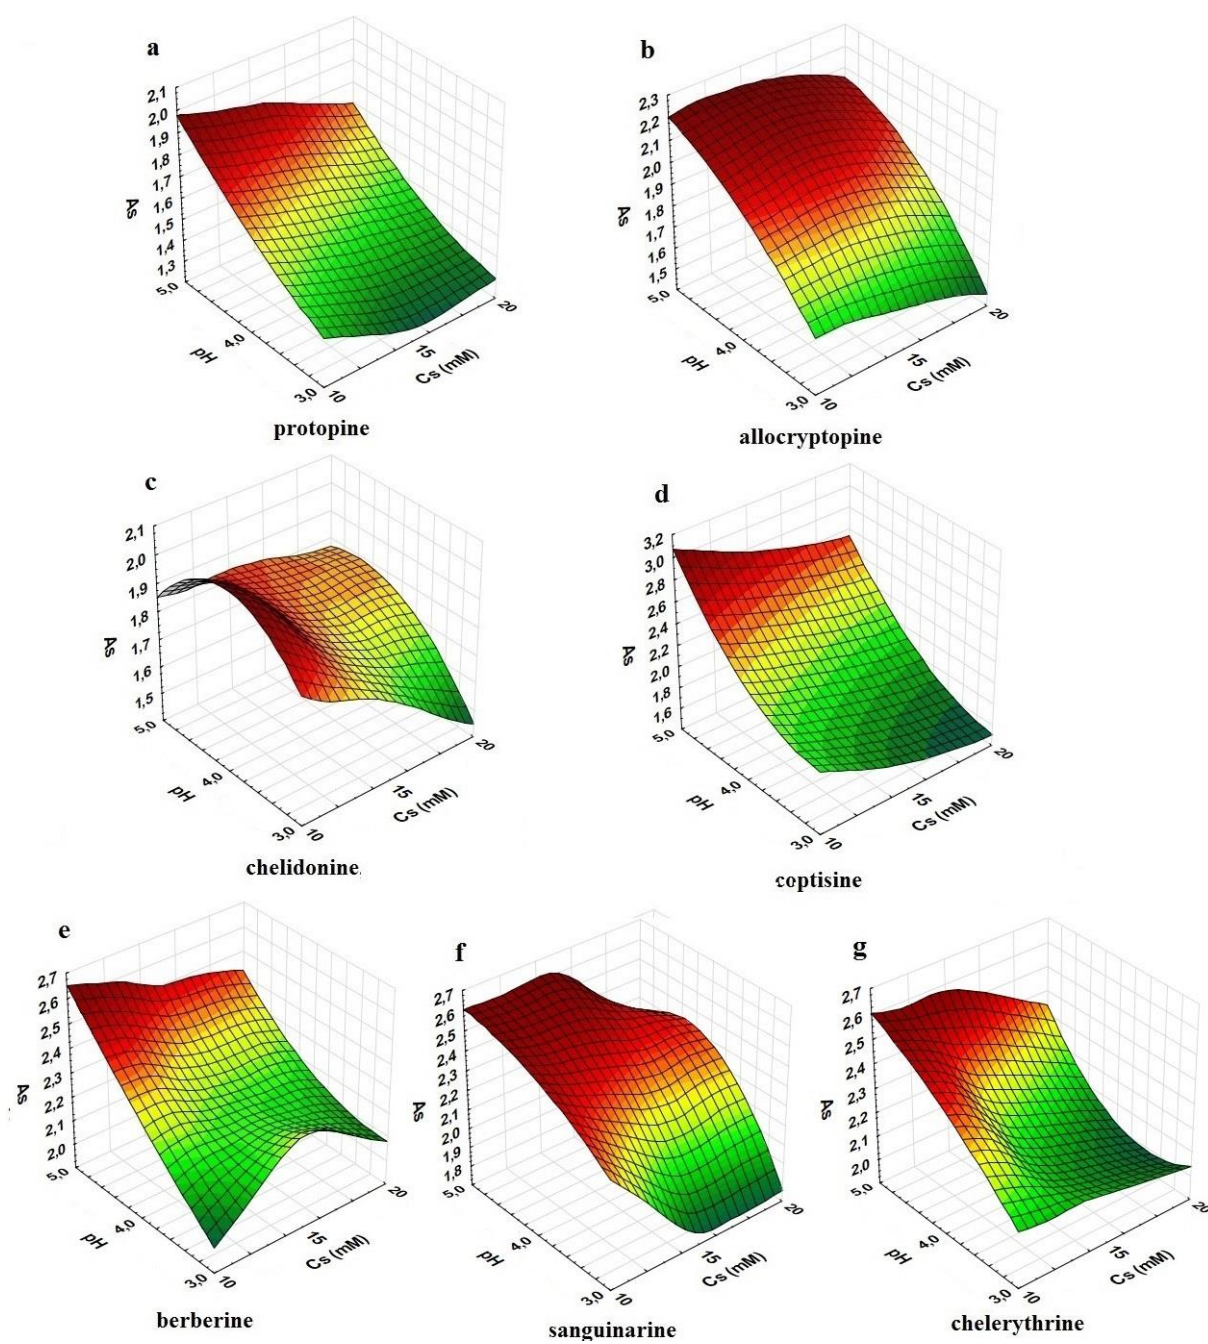

**Figure 2S.** Relationship between asymmetry ( $A_s$ ) of chromatographic peaks and pH of eluent and ammonium acetate concentration in mobile phase composed of water and acetonitrile (8:2, v/v).

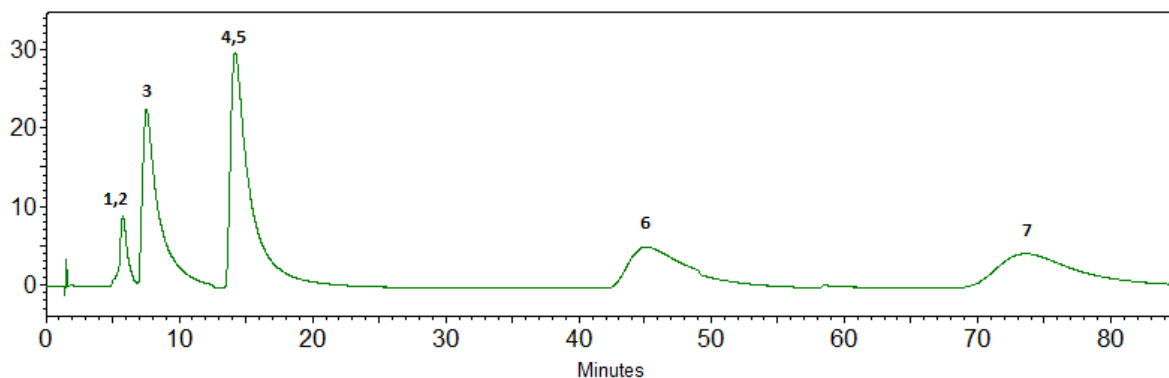

**Figure 3S.** Example of chromatogram obtained using monolithic column as a stationary phase and mobile phase composed of methanol and 15mM aqueous solution of ammonium acetate (3:7, v/v) adjusted with acetic acid to pH 5. 1- protopine, 2- allocryptopine, 3-coptisine, 4-chelidinine, 5- berberine, 6- chelerythrine, and 7- sanguinarine

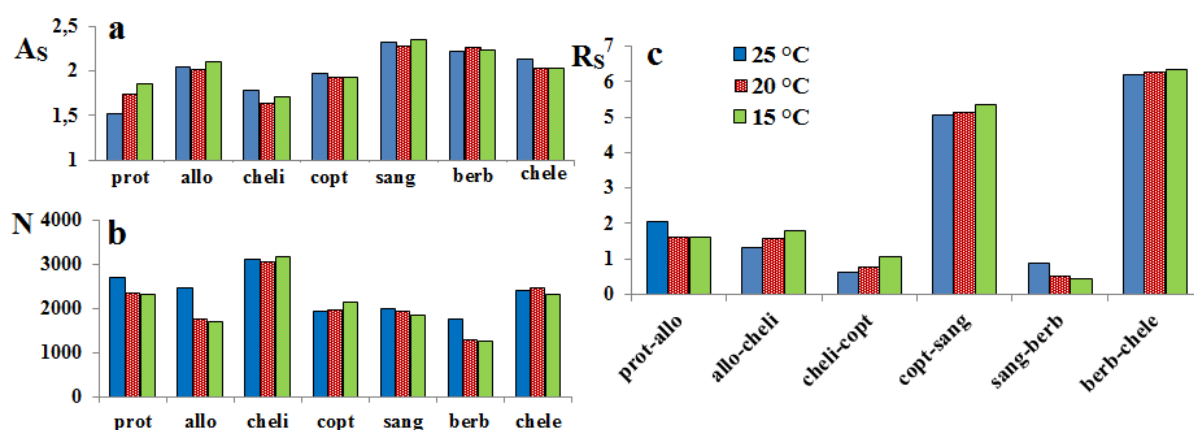

**Figure 4S.** Relationship between temperature and asymmetry ( $A_s$ ), efficiency of chromatographic system ( $N$ ) and resolution of neighbouring peaks on chromatogram ( $R_s$ ).

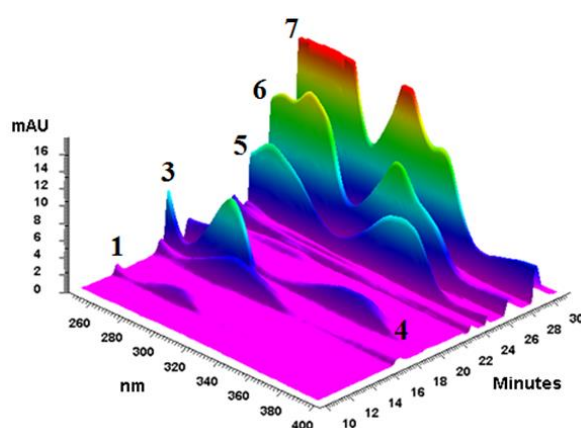

**Figure 5S.** Example of 3D chromatograms obtained using combination of three monolithic columns and elaborated gradient elution program: 1- protopine, 3-chelidinine, 4- coptisine, 5- berberine, 6- sanguinarine, and 7- chelerythrine.

**Table S1.** Comparison of system efficiency using methanol and acetonitrile as an organic modifier. Temperature of the column - 25°C, flow rate of the mobile phase - 1ml/min. Abbreviations: N – theoretical plate number,  $W_{50\%}$  - width at 50% high.

|                | 30%MeOH 15mM CH <sub>3</sub> COONH <sub>4</sub> pH=4 |            | 20% ACN 15mM CH <sub>3</sub> COONH <sub>4</sub> pH=4 |            |
|----------------|------------------------------------------------------|------------|------------------------------------------------------|------------|
|                | N                                                    | $W_{50\%}$ | N                                                    | $W_{50\%}$ |
| protopine      | 1008                                                 | 0.43       | 2695                                                 | 0.22       |
| allocryptopine | 721                                                  | 0.53       | 2471                                                 | 0.26       |
| chelidonine    | 1466                                                 | 0.42       | 3105                                                 | 0.27       |
| coptisine      | 541                                                  | 0.7        | 1933                                                 | 0.35       |
| berberine      | 1045                                                 | 0.88       | 1765                                                 | 0.62       |
| sanguinarine   | 701                                                  | 1.73       | 2001                                                 | 0.52       |
| chelerythrine  | 910                                                  | 2.25       | 2418                                                 | 0.91       |

**Table S2.** Validation parameters and the results of quantitative analysis of alkaloids in *C. majus* root.

| Compound       | Curve equation                  | R <sup>2</sup> | LOD (mg/mL) | LOQ (mg/mL) | Content (mg/100g ± SD) |
|----------------|---------------------------------|----------------|-------------|-------------|------------------------|
| protopine      | $y = 20\,979\,870x + 14\,372$   | 0.9999         | 0.00082     | 0.00245     | 158.50 ± 3.88          |
| allocryptopine | $y = 10\,079\,605\,x + 17\,065$ | 0.9992         | 0.00313     | 0.00939     | -                      |
| chelidonine    | $y = 40\,221\,072x - 22\,242$   | 0.9999         | 0.00249     | 0.00746     | 714.54 ± 37.35         |
| coptisine      | $y = 54\,402\,166x + 11\,845$   | 0.9992         | 0.00350     | 0.01051     | 193.53 ± 3.59          |
| sanguinarine   | $y = 79\,920\,166x + 40\,324$   | 0.9941         | 0.00756     | 0.02267     | 538.97 ± 9.45          |
| berberine      | $y = 87\,636\,814x - 27\,662$   | 0.9999         | 0.00050     | 0.00149     | 96.40 ± 1.47           |
| chelerythrine  | $y = 114\,250\,391x - 20\,078$  | 0.9998         | 0.00211     | 0.00632     | 506.85 ± 6.10          |
